# Supplementary material for: Early Health Economic Modeling of Novel Therapeutics in Age-Related Hearing Loss
Source: Frontiers journal article supplement (doi:10.3389/fnins.2022.769983), 2022-03-04
Supplement: Data_Sheet_1.zip [file Data_Sheet_1.zip]

**SDC 9: Threshold Analysis Summary**

**Figure 1a.** Threshold Analysis Summary – Comparison of Maximum Price for different HL severities


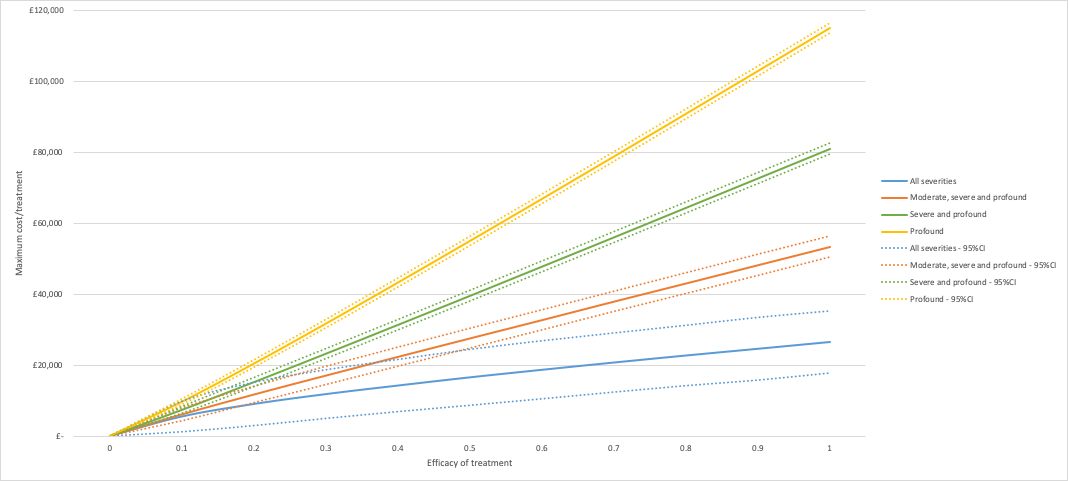


HL: hearing loss

**Figure 1b.** Threshold analysis Summary – Comparison of Number of treatments required for different HL severities


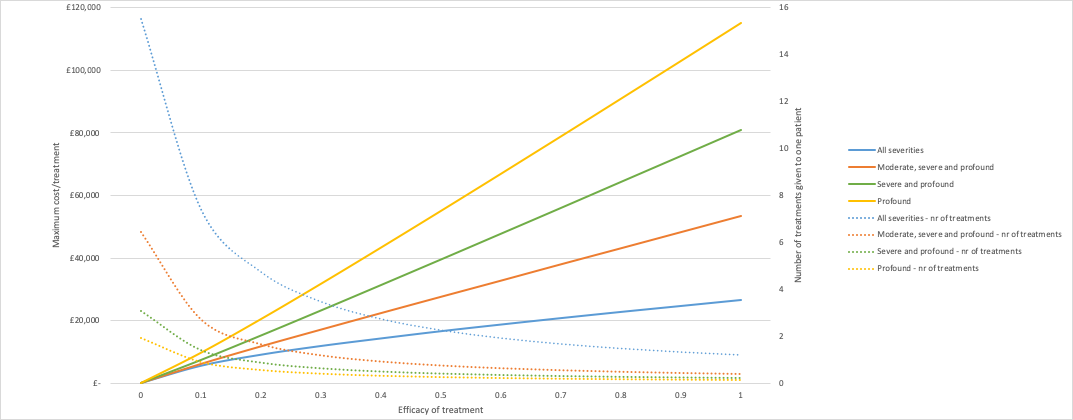


HL: hearing loss
